# Supplementary material
Source: HighWire-hosted journal article supplement (https://molpharm.aspetjournals.org/highwire/filestream/85787/field_highwire_adjunct_files/0/92_supp_data.pdf)
Supplement: 92_supp_data.pdf [file 92_supp_data.pdf]

**MOLPHARM/2020/000092**

## **SUPPORTING INFORMATION**

### **Domain-swap dimerization of *Acanthamoeba castellanii* CYP51 and a unique mechanism of inactivation by isavuconazole**

Vandna Sharma<sup>1</sup>, Brian Shing<sup>1</sup>, Lilian Hernandez-Alvarez<sup>1,2</sup>, Anjan Debnath<sup>1</sup>, Larissa M. Podust<sup>1\*</sup>.

<sup>1</sup>Skaggs School of Pharmacy and Pharmaceutical Sciences, Center for Discovery and Innovation in Parasitic Diseases, University of California San Diego, La Jolla, CA 92093, USA.

<sup>2</sup>Departamento de Física, Instituto de Biociências, Letras e Ciências Exatas, Universidade Estadual Paulista Julio de Mesquita Filho, São José do Rio Preto, São Paulo, Brazil.

#### **This PDF file includes:**

Recombinant AcCYP51 amino acid sequence – Data S1

AcCYP51 expression and purification protocols – Data S2

Composition of 4000X rare salt solution - Table S1

Composition of lysis buffer – Table S2

Composition of purification buffers – Table S3

## Data S1 - Recombinant AcCYP51 amino acid sequence

MAKKTSSKGKLPVVSLLIPFVGSGLSFAGGPLYTTDAYKKYGDIFTMKVFGQRLTFLVGPDAHVPFFSQGDAELSQDEPYQ  
FSVPIFGPNVVGADLAHRNQQLKFIAASLSTKALQSYVPLIVKEADFFAKWDKSGTVDIRDALAEIIILTASRCLMGKEIR  
ENLFTEVAKLYQTLDEGLLPISVFFPYLPPIPAHKRRDEARLAMVRMFKKIIDERRANPEVKHNDCLQVMDARYRGEEQALND  
EEITGLMIALLFAGQHTSSVTGSGTGLLLFEANNKKKFLPGVLEEQEEIRKEFGDELTEALNKMDKLHRCVKEALRMYPPLL  
FVMRKVIKPFYSYKDYYVPEGDTVFVSPALSMRVEEVFPNADQYNPERFVEEDKQAQKYRFVGFAGRHGCMGENFAYLQIKTI  
WSVLLRNFDIELVGELPKPDYTMVVGPAHPCLLRTRKHHHHHH

## Codon-optimized DNA sequence:

ATGGCCAAAAGACGTCTTCAAAGGGTAAATTACCACCGGTTGTGAGCAGTTTGATTCCATTTGTGGGTAGCGGCCTGAGTTT  
CGCAGGTGGTCCGTTGCAATACCACTGATGCATACAAAAGTACGGCGACATCTTTACGATGAAAGTTTTTCGGCCAAAGAT  
TAACCTTTTTTGGTCGGTCCAGATGCCCATGTACCGTTTTTCTCTCAGGGCGATGCGGAACTGTCACAAGACGAACCTTATCAG  
TTTTCCGTTCCGATTTTCGGCCCTAATGTCGTATACGGTGCTGATTTGGCACACCGCAACCAACAGCTGAAGTTTATTGCTGC  
ATCTCTGTCAACTAAAGCGTTACAATCGTACGTCCCACTGATCGTAAAGAAGCCGAAGATTTCTTTGCGAAGTGGGACAAAA  
GCGGCACTGTGGATATTCGTGACGCCCTGGCGGAATTAATTATCTTGACAGCCAGTCGTTGTTTGATGGGCAAGGAAATCAGA  
GAAAACCTGTTTACCGAAGTTGCGAACTGTATCAGACATTAGATGAAGGTCTGTTGCCTATTTCTGTATTTTTCCCATACTT  
ACCGATCCCTGCTCATAAACGTAGAGATGAAGCCCGCCTGGCGATGGTTTCGTATGTTCAAAAAGATTATCGATGAACGCCGTG  
CAAATCCGGAAGTTAAACACAACGATTGCCTGCAAGTGTTTCATGGACGCCCGTTATCGTGGTGAAGAACAGGCGTTAAATGAT  
GAAGAAATTACAGGCTTGATGATCGCTTTGCTGTTTGAGGTCAACATACATCCTCGGTTACGGGCAGTTGGACCGGTTTGTT  
GCTGTTTGAAGCTAACAACAAAAAGAAATTCTTGCCAGGCGTGCTGGAAGAACAGGAAGAAATTCGTAAAGAATTTGGCGATG  
AATTGACTATGGAAGCTCTGAACAAGATGGACAACTGCATAGATGTGTCAAAGAAGCATTACGCATGTATCCTCCATTATTG  
TTCGTTATGAGAAAAGTTATTAAACCATCTCTTACAAAGATTATTACGTTCCGGAAGGTGACACAGTCTTTGTATCCCCTGC  
CCTGTGATGAGAGTTGAAGAAGTGTTCGGAATGCGGATCAATATAACCCTGAACGCTTCGTTGAAGAAGACAAGCAAGCTC  
AGAAATACCGCTTTGTGGGTTTCGGCGCAGGTCGTATGGCTGTATGGGTGAAAATTTTGCTTATCTGCAGATTAAGACCATC  
TGGTCTGTCCTGTTACGCAACTTCGATATTGAATTAGTAGGCGAATTGCCAAAACCGGACTATACGGCTATGGTTGTGGGTCC  
TGCACACCCATGCTTGCTGCGTTACACCAGAAAACATCACCATCACCATCACTAA

**Data S1 Legend. Recombinant AcCYP51.** The codon-optimized cDNA sequence of AcCYP51 (NCBI Reference: XP\_004334294.1) was generated synthetically (GenScript, Piscataway, New Jersey). The 42 N-terminal residues were replaced with the MAKKTSSKGK lead sequence and the 6xHis tag is added at the C-terminus. The synthetic DNA construct was cloned between the NdeI and HindIII restriction sites into the pCW-LIC expression vector obtained from the non-profit plasmid repository (Addgene, Cambridge, MA). Engineered sequences are shaded in cyan and region involved in the domain swap interactions is underlined.

## Data S2 - AcCYP51 expression and purification protocols.

**Expression:** Fresh transformants containing the pCW-AcCYP51 vector were obtained after transforming ~ 50 ng of vector DNA into HMS 174 *E.coli* cells pre-transformed with pGro7 plasmid (Takara) carrying GroEL/ES chaperones. After overnight incubation at 37 °C on an LB agar plate supplemented with 50 µg/ml ampicillin and 20 µg/ml chloramphenicol, a selected single colony was used to set up a primary culture in LB media supplemented with 50 µg/ml ampicillin and 20 µg/ml chloramphenicol. Primary culture was incubated overnight at 37 °C, 250 rpm.

10 ml of the primary culture were used to set up secondary culture in 1 liter of Terrific Broth media supplemented with 1 mM Thiamine, 50 µg/ml ampicillin, 20 µg/ml chloramphenicol, 1X rare salt solution (**Table S1**). After inoculation, the culture was incubated for 5 h at 37 °C with constant stirring at 200 rpm. When OD<sub>600</sub> reached approximately 0.4-0.5 a.u., the incubation temperature was reduced to 25 °C and stirring was reduced to 145 rpm. Growth continued until OD<sub>600</sub> reached 0.6-0.8 a.u., then AcCYP51 expression was induced with 0.25 mM isopropyl-β-D-thiogalactopyranoside (IPTG). Simultaneously, arabinose was added to 0.5 mg/ml to induce chaperone expression. Finally, the media was also supplemented with a heme precursor - 1 mM delta-aminolevulinic acid - and incubated for 45-48 h at 25 °C, 145 rpm.

After incubation, the culture was harvested at 6000 g, 4 °C for 15 min and the cell pellet was suspended evenly in 10-15 ml of lysis buffer (**Table S2**) and 25 µl of lysozyme (from 50 mg/ml stock) was added per liter of culture. Cell suspension was stored at -80 °C.

**Purification:** Cells were disrupted using a fluid processor Microfluidics M-110P (Microfluidics Inc.) and cell debris were removed by centrifuging at 4 °C, for 30 min. at 15000 rpm.

The supernatant thus obtained was loaded onto a pre-equilibrated Ni-NTA column. Following loading, the column was washed with 10 column volumes (CV) of wash buffer I (refer **Table S3** for buffer compositions) followed by 10 CV of wash buffer II. Finally, column-bound His-tagged protein was eluted under a linear gradient of 0-100 mM L-histidine (Sigma).

Fractions containing AcCYP51 were pooled together and loaded onto a pre-equilibrated Q-Sepharose column. Protein was collected in the flow-through and re-loaded onto a pre-equilibrated hydroxyapatite (HAP) column. Protein bound to HAP column was eluted under a linear gradient of 0.05 – 1.0 M K-phosphate buffer, pH 8.0, supplemented with 10% glycerol and 0.5 mM EDTA. Protein fractions containing AcCYP51 were pooled and concentrated to 2-3 mg/ml. Concentrated AcCYP51 was then injected onto a pre-equilibrated Superdex 200 XK 26 size-exclusion chromatography (SEC) column and the AcCYP51 fractions corresponding to monomer and dimer populations were eluted and pooled separately. Each protein pool was concentrated to ~ 1 mM and stored at -80 °C.

**Table S1: Composition of 4000X rare salt solution**

|                                                      |                   |
|------------------------------------------------------|-------------------|
| FeCl <sub>3</sub> .6H <sub>2</sub> O                 | 2.7 g             |
| ZnCl <sub>2</sub> .4H <sub>2</sub> O                 | 0.2 g             |
| CoCl <sub>2</sub> .6H <sub>2</sub> O                 | 0.2 g             |
| Na <sub>2</sub> MoO <sub>4</sub> . 2H <sub>2</sub> O | 0.2 g             |
| CaCl <sub>2</sub> .2H <sub>2</sub> O                 | 0.1 g             |
| CuSO <sub>4</sub> .5 H <sub>2</sub> O                | 0.186 g           |
| H <sub>3</sub> BO <sub>3</sub>                       | 0.05 g            |
| Add HCl until salts dissolve                         |                   |
| Deionized water                                      | Make up to 100 ml |

**Table S2: Composition of lysis buffer**

| Reagents            | Working concentration |
|---------------------|-----------------------|
| Glycerol            | 5%                    |
| K-Phosphate, pH-8.0 | 50 mM                 |
| EDTA                | 0.5 mM                |
| NaCl                | 300 mM                |
| PMSF                | 0.5 mM                |
| DTT                 | 1 mM                  |

**Table S3: Composition of purification buffers**

| Component                        | Reagent                                        | Working concentration       |
|----------------------------------|------------------------------------------------|-----------------------------|
| <b>Ni-NTA</b>                    |                                                |                             |
| Equilibration buffer             | K-phosphate, pH 8.0<br>NaCl<br>Glycerol        | 50 mM<br>300 mM<br>10 %     |
| Wash buffer I                    | Same as equilibration buffer                   |                             |
| Wash buffer II                   | K-phosphate, pH 8.0<br>Glycerol                | 50 mM<br>10 %               |
| Elution buffer                   | K-phosphate, pH 8.0<br>Glycerol<br>L-Histidine | 50 mM<br>10 %<br>0-100 mM   |
| <b>Q-Sepharose</b>               |                                                |                             |
| Equilibration and running buffer | K-phosphate, pH 8.0<br>Glycerol                | 50 mM<br>10 %               |
| <b>HAP</b>                       |                                                |                             |
| Equilibration buffer             | K-Phosphate, pH 8.0<br>Glycerol                | 50 mM<br>10%                |
| Elution buffer                   | K-Phosphate, pH 8.0<br>Glycerol<br>EDTA        | 0.05 – 1 M<br>10%<br>0.5 mM |
| <b>Superdex 200 XK 26</b>        |                                                |                             |
| Equilibration and running buffer | K-Phosphate, pH 8.0<br>Glycerol                | 50 mM<br>5%                 |
